# Supplementary material for: Shifts in diversity and function of lake bacterial communities upon glacier retreat
Source: PubMed Central journal article supplement (PMC4852812; doi:10.1038/ismej.2015.245), 2016-01-15

## Supporting Material 1

Panel A provides a map of the Faselfad catchment with the glacier, the uppermost lake FAS 1 (2600 m a.s.l.), the turbid lakes FAS 3 (2400 m a.s.l.) and FAS 6 (2200 m a.s.l.) and the clear lake FAS4 (2400 m a.s.l.). FAS 1 and FAS 3 are connected with a stream (indicated by dashed lines), however, depending on time of the year this stream flows partially below the surface. FAS 4 and FAS 6 are also connected by a partially subsurface stream. Panel B shows an orthophotography of the same area. Panel C – F provide photographs taken from the shores of the lakes during the first sampling campaign (see inserts for location and date). Photography courtesy of F. Drewes.

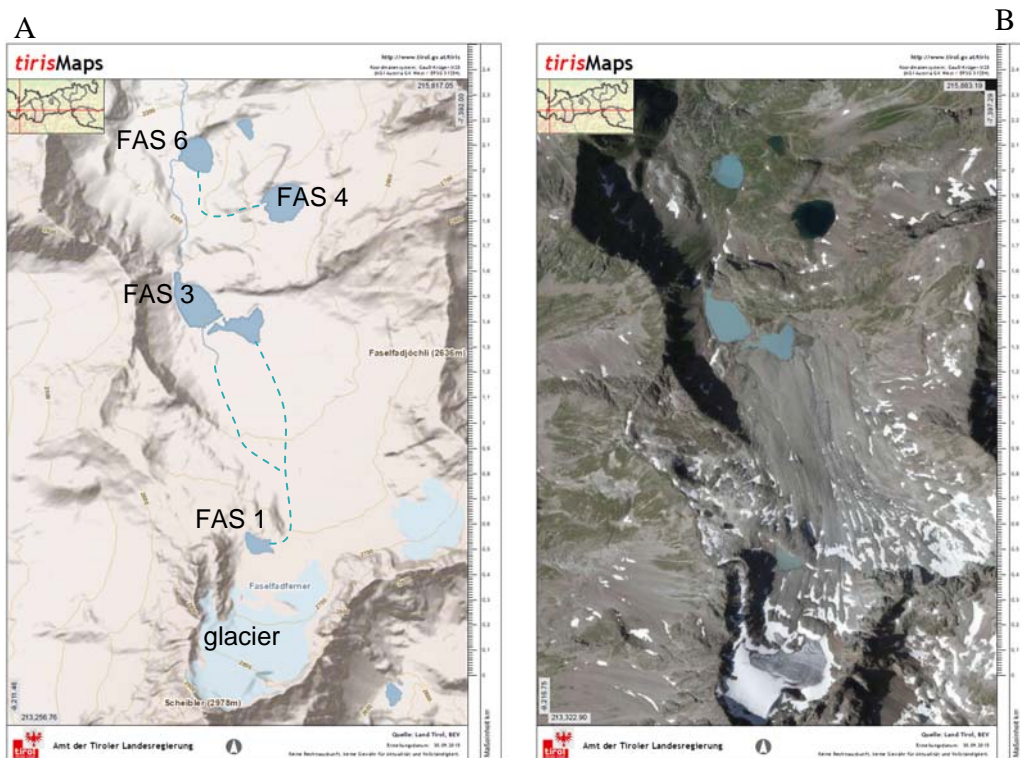

Map source: <http://www.tirol.gv.at/tiris>

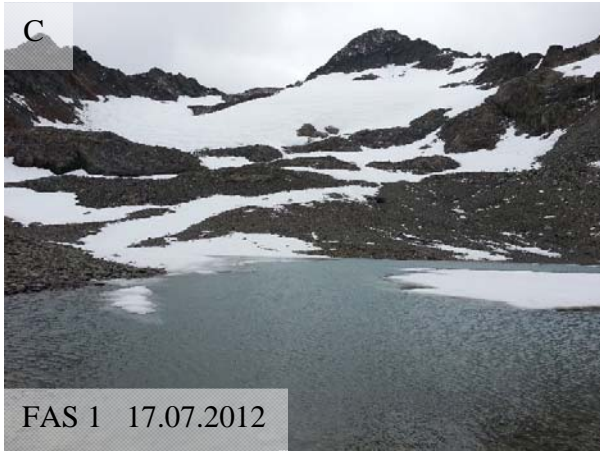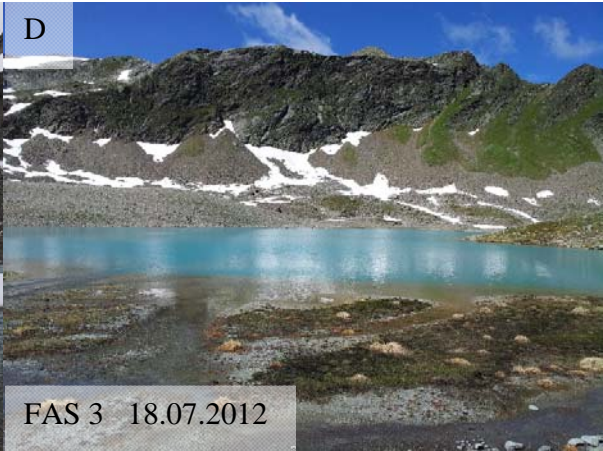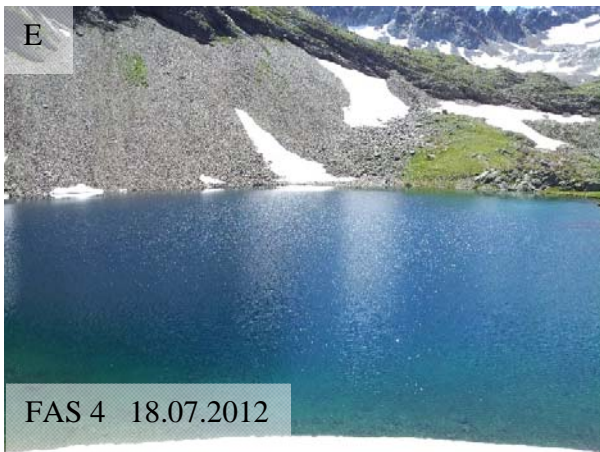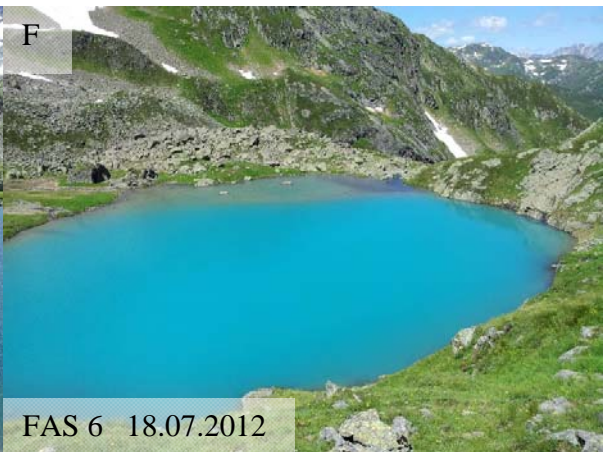

**Supporting Table 1** Key environmental parameters, chlorophyll-a concentrations and bacterial cell numbers of the Faselfad lakes during the ice-free season of 2012.

| site  | date     | Turbidity<br>[NTU] | DOC<br>[ $\mu\text{g L}^{-1}$ ] | TDP<br>[ $\mu\text{g L}^{-1}$ ] | DN<br>[ $\mu\text{g L}^{-1}$ ] | Chlorophyll-a<br>[ $\mu\text{g L}^{-1}$ ] | Bacterial<br>abundance<br>[ $10^5$ cells $\text{mL}^{-1}$ ] |
|-------|----------|--------------------|---------------------------------|---------------------------------|--------------------------------|-------------------------------------------|-------------------------------------------------------------|
| FAS 1 | 07/17/12 | 13.3               | 198.0                           | 2.3                             | 161.3                          | 0.12                                      | 0.68                                                        |
|       | 08/01/12 | 11.6               | 176.0                           | 3.5                             | 149.5                          | 0.13                                      | 1.48                                                        |
|       | 08/28/12 | 42.8               | 267.2                           | 4.6                             | 194.5                          | 0.13                                      | 2.27                                                        |
|       | 10/02/12 | 6.2                | 137.2                           | 2.5                             | 254.7                          | NA                                        | 1.59                                                        |
| FAS 3 | 07/17/12 | 9.9                | 218.3                           | 4.0                             | 162.0                          | 0.99                                      | 1.46                                                        |
|       | 08/01/12 | 3.4                | 174.4                           | 1.5                             | 141.2                          | 1.14                                      | 6.10                                                        |
|       | 08/28/12 | 11.2               | 412.2                           | 2.5                             | 137.8                          | 4.57                                      | 3.89                                                        |
|       | 10/02/12 | 4.6                | 212.5                           | 1.5                             | 189.2                          | NA                                        | 2.05                                                        |
| FAS 4 | 07/17/12 | 0.2                | 219.3                           | 0.7                             | 191.3                          | 0.37                                      | 1.52                                                        |
|       | 08/01/12 | 0.3                | 241.7                           | 0.9                             | 175.1                          | 1.15                                      | 1.02                                                        |
|       | 08/28/12 | 0.2                | 373.0                           | 2.0                             | 171.0                          | 1.21                                      | 3.03                                                        |
|       | 10/02/12 | 0.1                | 319.6                           | 0.6                             | 176.4                          | NA                                        | 0.79                                                        |
| FAS 6 | 07/17/12 | 1.3                | 253.0                           | 1.0                             | 139.0                          | 0.47                                      | 1.86                                                        |
|       | 08/01/12 | 2.4                | 281.3                           | 1.5                             | 136.0                          | 0.45                                      | 4.10                                                        |
|       | 08/28/12 | 6.3                | 339.8                           | 1.3                             | 147.2                          | 4.36                                      | 2.70                                                        |
|       | 10/02/12 | 2.4                | 295.7                           | 1.1                             | 160.4                          | NA                                        | 1.77                                                        |

**Supporting Table 2** Non-exhaustive literature search for Nitrospirae in glacial, cold or alpine environments.

| <b>environment</b>      | <b>location</b>                   | <b>reference</b> |
|-------------------------|-----------------------------------|------------------|
| proglacial stream       | glacier runoff, Austria           | (1)              |
| glacial lake shore soil | Roopkund glacier, Himalaya, India | (2)              |
| glacial ice             | Laohugou Glacier No. 12, China    | (3)              |
| proglacial soil         | Kafni glacier, Himalayan, India   | (4)              |
| proglacial soil         | Pindari glacier, Himalaya, India  | (5)              |
| proglacial soil         | Tianshan glacier, China           | (6)              |
| proglacial soil         | West Spitsbergen, Norway          | (7)              |
| proglacial soil         | Broknes Peninsula, Antarctica     | (8)              |

1. Wilhelm L, Singer GA, Fasching C, Battin TJ, & Besemer K (2013) Microbial biodiversity in glacier-fed streams. *ISME J* 7(8):1651-1660.
2. Pradhan S, *et al.* (2010) Bacterial biodiversity from Roopkund Glacier, Himalayan mountain ranges, India. *Extremophiles* 14(4):377-395.
3. Zhang S, *et al.* (2015) Preliminary Study on Effects of Glacial Retreat on the Dominant Glacial Snow Bacteria in Laohugou Glacier No. 12. *Geomicrobiology Journal* 32(2):113-118.
4. Srinivas TNR, *et al.* (2011) Comparison of bacterial diversity in proglacial soil from Kafni Glacier, Himalayan Mountain ranges, India, with the bacterial diversity of other glaciers in the world. *Extremophiles* 15(6):673-690.
5. Shivaji S, *et al.* (2011) Bacterial diversity of soil in the vicinity of Pindari glacier, Himalayan mountain ranges, India, using culturable bacteria and soil 16S rRNA gene clones. *Extremophiles* 15(1):1-22.
6. Wu X, *et al.* (2012) Bacterial diversity in the foreland of the Tianshan No. 1 glacier, China. *Environmental Research Letters* 7(1).
7. Schuette UME, *et al.* (2010) Bacterial diversity in a glacier foreland of the high Arctic. *Molecular Ecology* 19:54-66.
8. Bajerski F & Wagner D (2013) Bacterial succession in Antarctic soils of two glacier forefields on Larsemann Hills, East Antarctica. *Fems Microbiology Ecology* 85(1):128-142.

**Supporting Figure 1** Distribution of OTUs among turbid and clear lakes and glacier runoff samples. A ternary plot showing mean relative abundance of each OTU in samples of turbid and clear alpine lakes and the glacier runoff (**panel A**). The colors indicate phylogenetic affiliation, circle size reflects relative abundance (log-transformed). OTUs equally common in the three sample categories are located in the center of the ternary plot. Abundant OTUs (large circles) were found in similar relative abundance in the three categories and mainly belonged to the beta-subclass of Proteobacteria (see also **panel B** for a plot of occupancy versus total sequence abundance for each OTU). Most of the OTUs were either exclusively found in the turbid lakes and glacier runoff or shared among different categories, whereas only few OTUs were shared between the glacier runoff and the clear lake, highlighting the reluctance of glacier-associated microbes to establish in clear alpine lakes. **Panel C** provides a heatmap of relative abundance (log transformed, see color key) of the 60 most abundant OTUs in all samples. The highest taxonomic classification is indicated along with the OTU number. Note the high relative abundance of several OTUs in the glacier and FAS1, which became less abundant in the turbid lakes FAS3 and FAS6. A group of OTUs related to Bacteroidetes occurred in high relative abundance in the clear lake FAS4, however was absent in the turbid lakes and the glacier runoff.

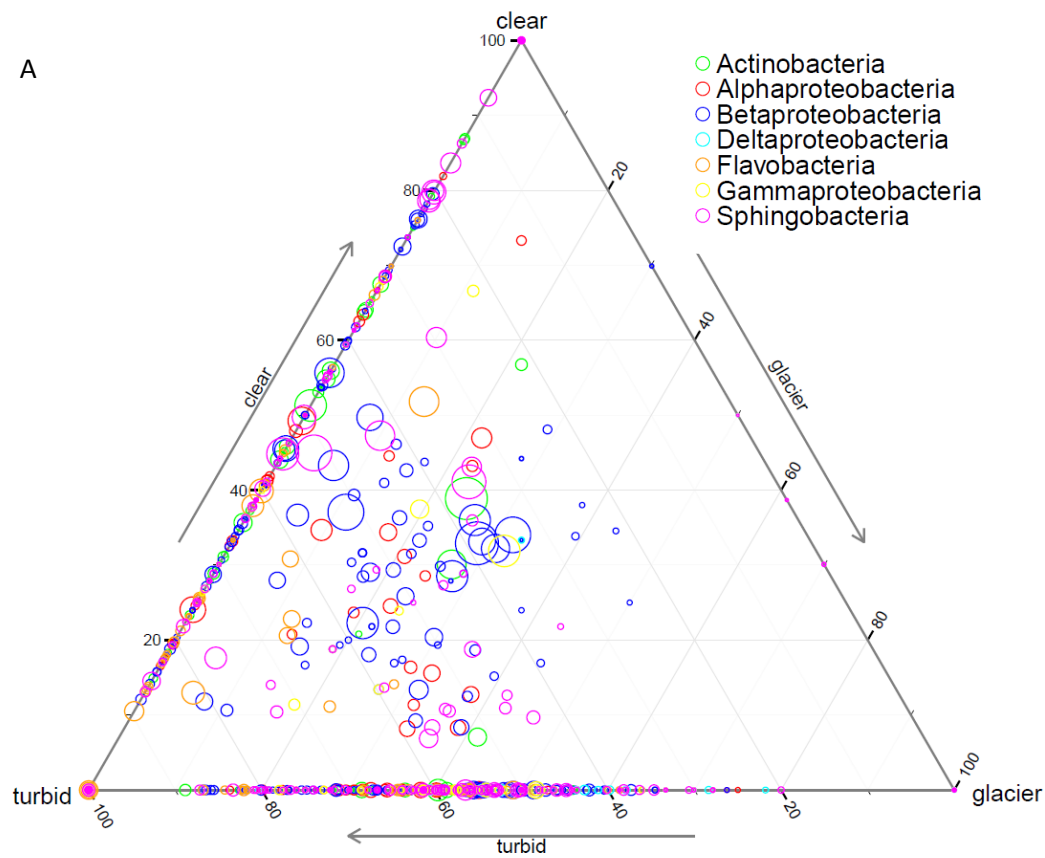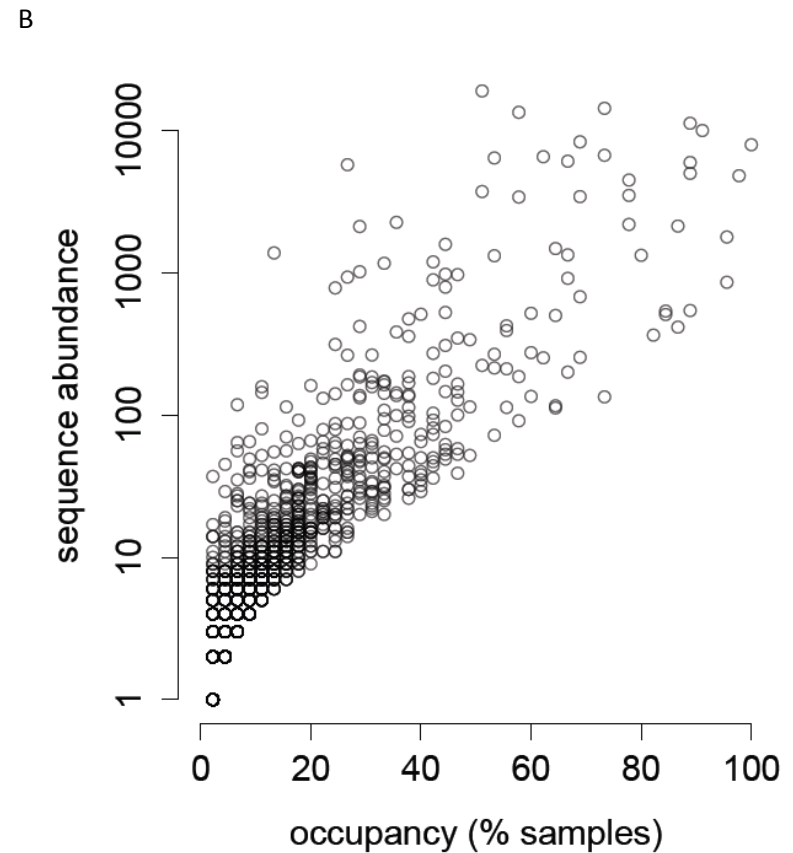

C

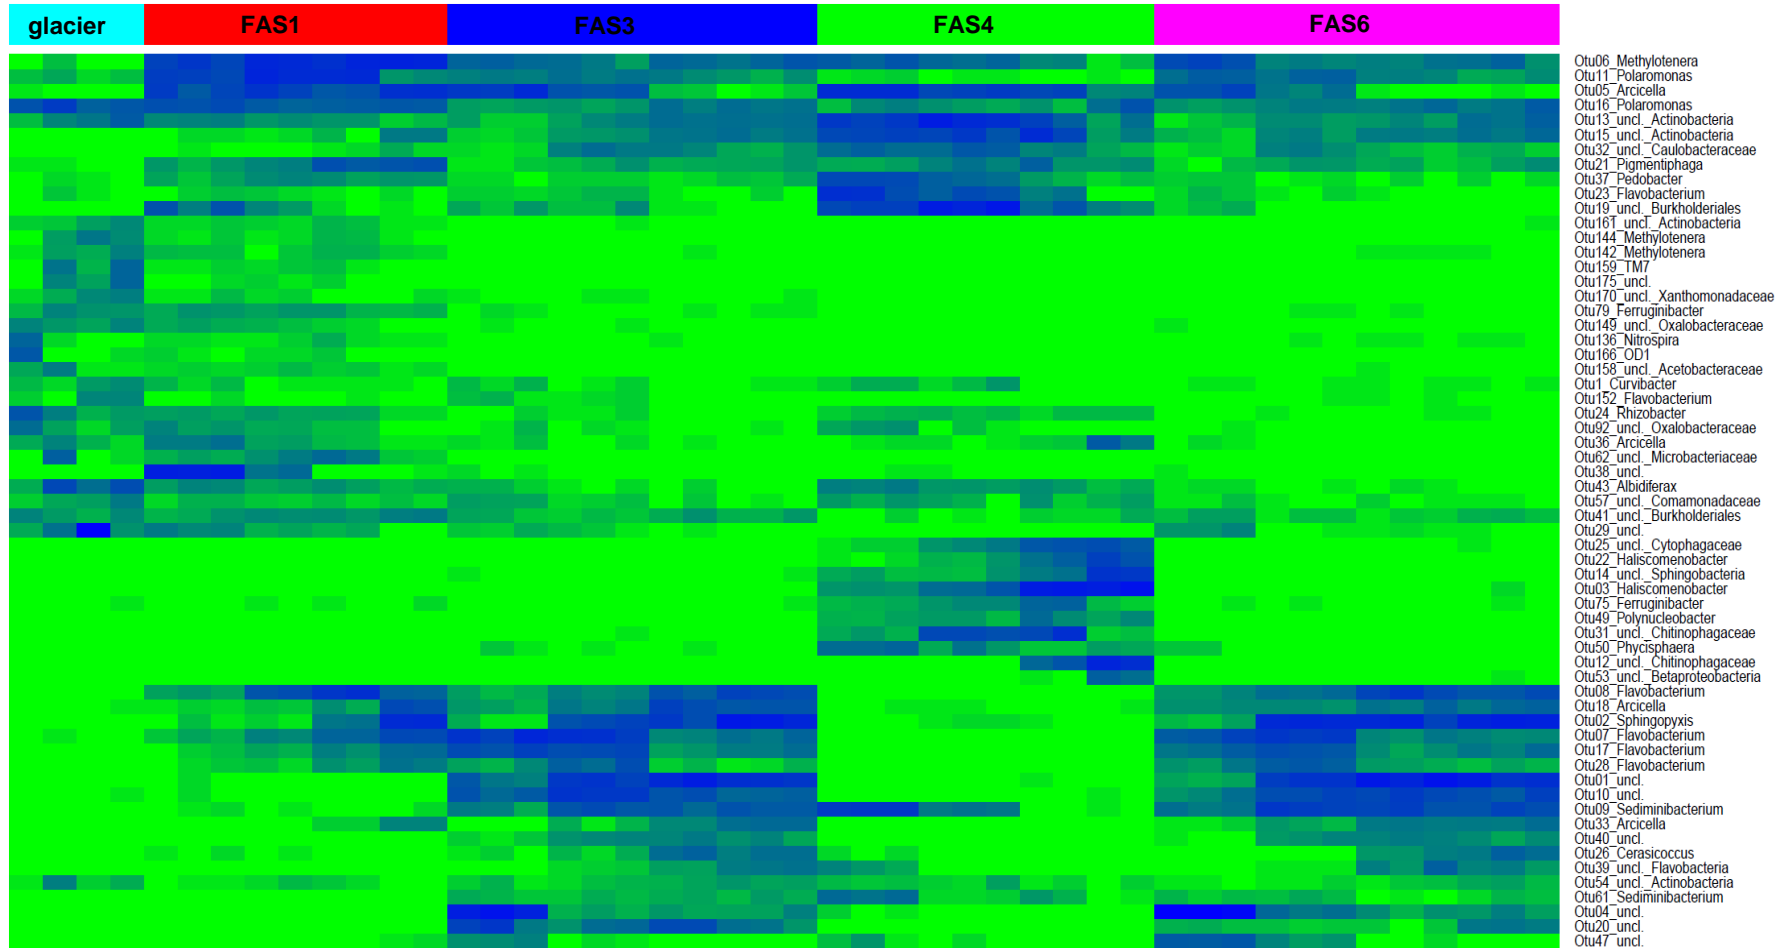

Color Key

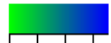

0 2 4 6

log relative abundance

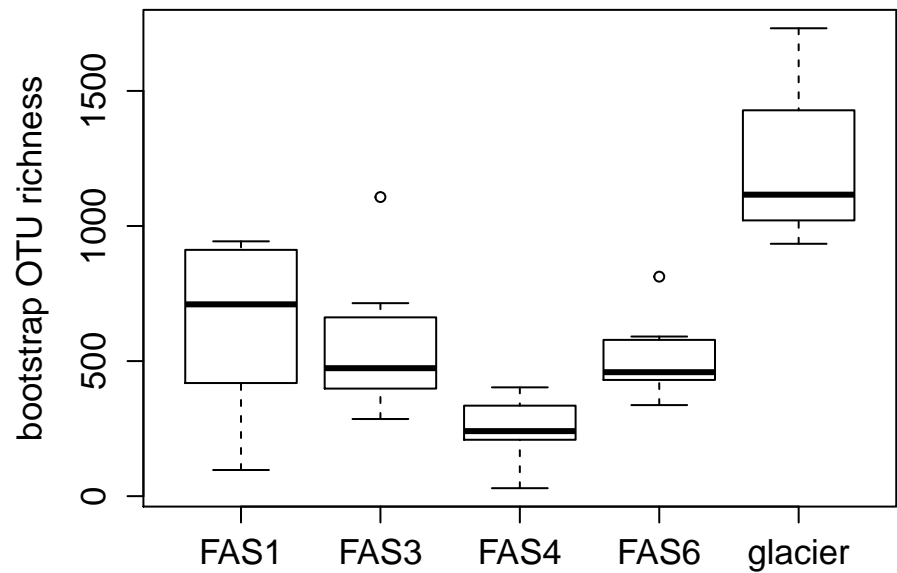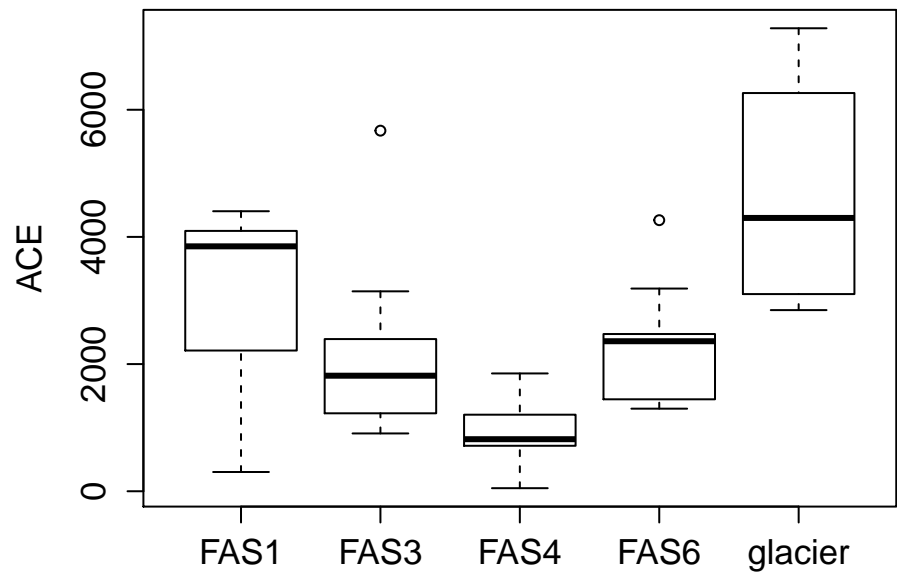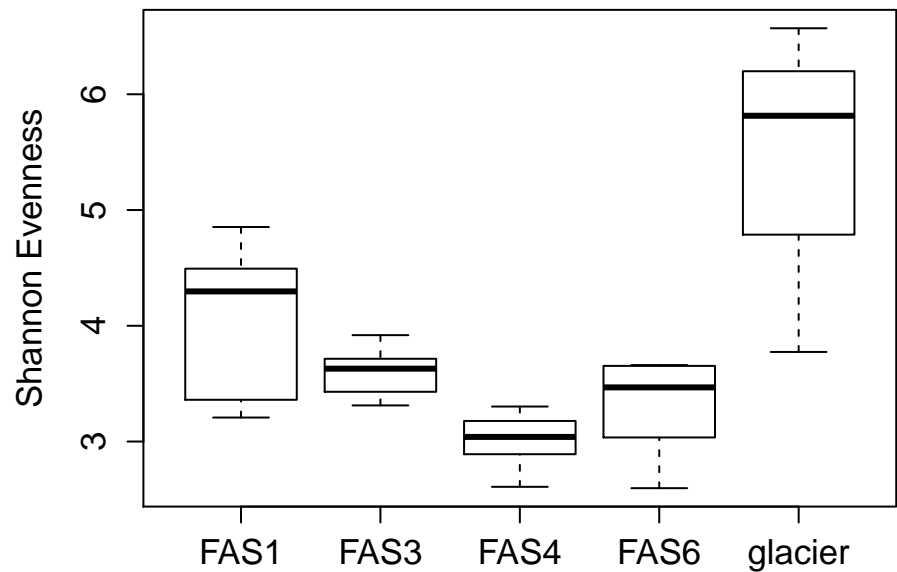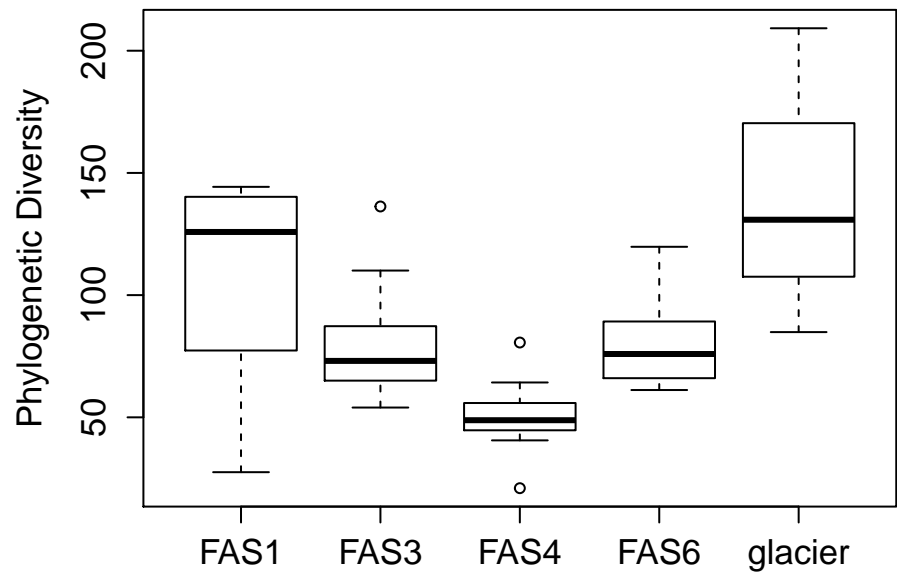

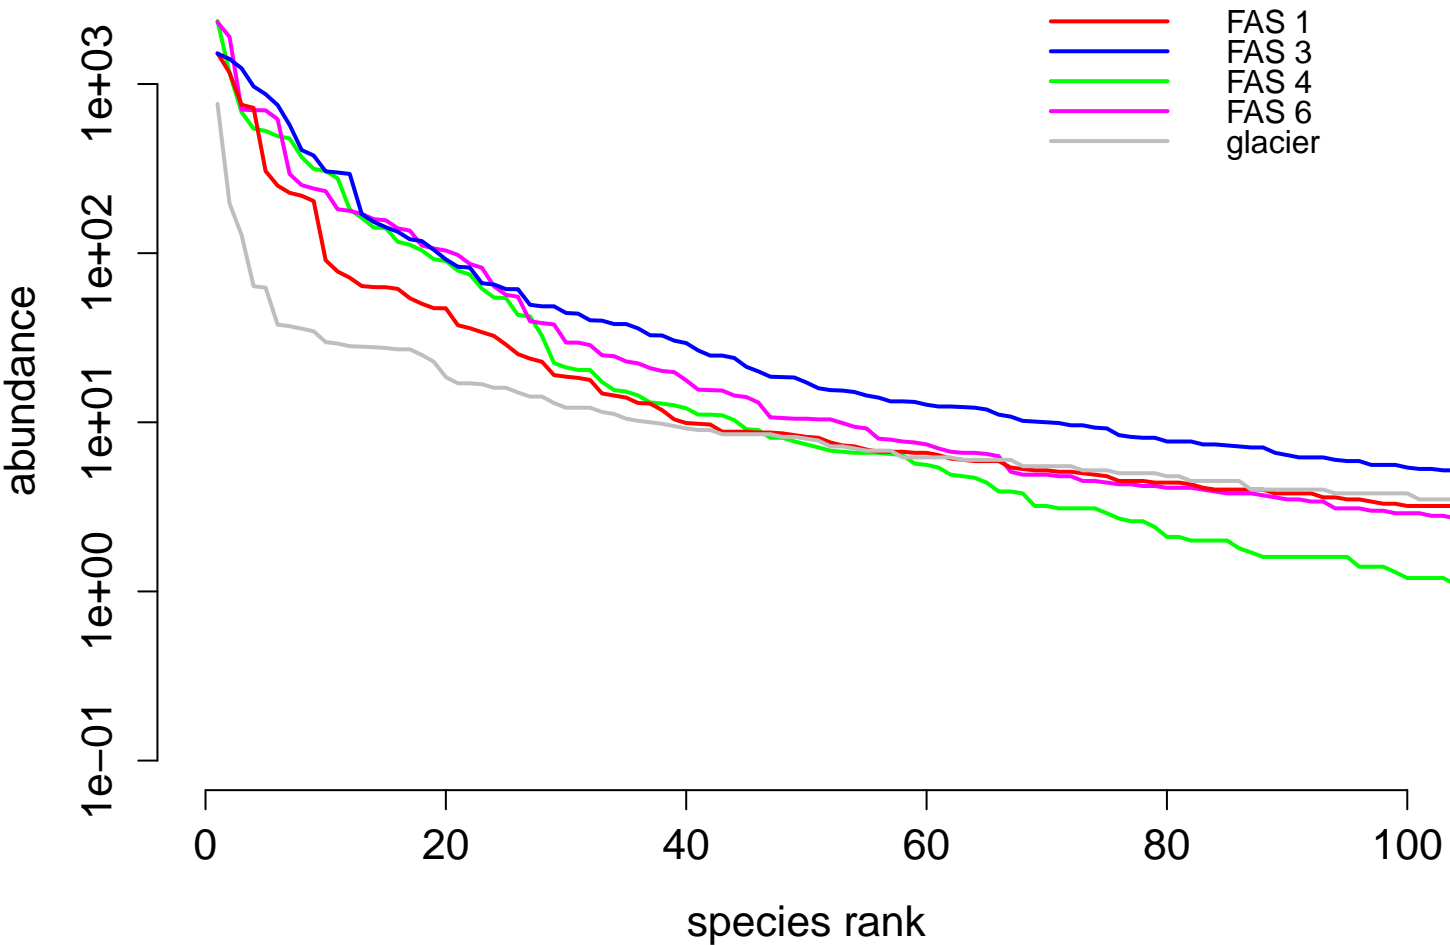

Supplement: NIHMS66964-supplement-Supplementary_information.pdf [file NIHMS66964-supplement-Supplementary_information.pdf]
